# Supplementary material
Source: publisher figshare collection journal article supplement (https://sage.figshare.com/ndownloader/files/20293557)
Supplement: Supplementary file 1 [file 20293557]

**Appendix H.** Final Understanding Process Flow Diagram (answer key)
